# Supplementary material
Source: publisher figshare collection journal article supplement (https://acs.figshare.com/ndownloader/files/23372660)
Supplement: Supplementary file 1 [file 23372660]

# Supporting Information

## Electrolyte Membranes with Biomimetic Lithium-Ion Channels

Wenyue Shi,<sup>‡</sup> Jianqiang Shen,<sup>‡</sup> Li Shen,<sup>§\*</sup> Wei Hu,<sup>°</sup> Pengcheng Xu,<sup>§</sup> Jesse A. Baucom,<sup>§</sup>  
Shengxiang Ma,<sup>§</sup> Shuxing Yang,<sup>§</sup> Xiao-Ming Chen<sup>||</sup> and Yunfeng Lu<sup>§\*</sup>

<sup>§</sup>Department of Chemical and Biomolecular Engineering, University of California, Los Angeles,  
CA 90095, USA

<sup>°</sup>College of Chemistry, Northeast Normal University, 5268 Renmin  
Street, Changchun 130024, PR China

<sup>||</sup>School of Chemistry and Chemical Engineering, Sun Yat-Sen University, Guangzhou 510275,  
PR China

<sup>‡</sup> Wenyue Shi and Jianqiang Shen contribute equally to this work.

E-mail address: [lishen@ucla.edu](mailto:lishen@ucla.edu), [luucla@ucla.edu](mailto:luucla@ucla.edu)

## Methods

**Synthesis of UN-SLi.** UN was synthesized according to reported literature through a hydrothermal reaction.<sup>1</sup> As-synthesized UN was mixed with excess 1,3-propanesultone in CHCl<sub>3</sub>. After stirring at 45 °C for 12 h, the bright yellow solid was collected through centrifugation. The solid was washed by CHCl<sub>3</sub> three times then dried at 80 °C to obtain UN-SH. UN-SLi was prepared by reacting UN-SH with excess LiCl aqueous solution. The final UN-SLi was collected by filtering,

washed by water and ethanol for three times each, and dried at 120 °C under vacuum for complete removal of water.

**Preparation of REF and UN-SLi-EM.** UN-SLi-EM was prepared by homogenously mixing 480 mg of MOFs (UN-SLi) with 320 mg of P(VdF-HFP) powders in 10 mL of dimethyl carbonate (DMC) and 2 mL of ethylene carbonate (EC) for 24 h (ambient temperature). 150  $\mu$ L of resulting suspension was uniformly added to each side (300  $\mu$ L in total) of a glass-fiber separator (18.5 mm in diameter, Whatman, GF/C). REF was prepared by a similar process without MOFs. After evaporation of DMC solvents, all membranes were stored in glove box for future characterizations and hot-pressed before being used.

**Approximation of the Debye length of sulfonate groups.** Assuming the lithium sulfonate groups ionize completely in the EC/DEC solvents, the following formula of Debye length for symmetric monovalent electrolytes is used for the calculation:  $\lambda_D = (\epsilon_r \epsilon_0 k_B T / q^2 \sum z_i^2 (N_A c_i))^{1/2}$  <sup>2,3</sup> (1), where  $\lambda_D$  is the Debye length in electrolyte solutions,  $\epsilon_r$  is the relative dielectric constant of the solvent,  $\epsilon_0 = 8.85 \times 10^{-12} \text{ F} \cdot \text{m}^{-1}$  is the vacuum permittivity,  $k_B = 1.38 \times 10^{-23} \text{ J K}^{-1}$  is the Boltzmann constant,  $T$  is the absolute temperature in kelvin,  $q = 1.60 \times 10^{-19} \text{ C}$  is the elementary charge,  $z_i$  is the charge number of the ion,  $N_A = 6.02 \times 10^{23} \text{ mol}^{-1}$  is the Avogadro constant, and  $c_i$  is the molar concentration of the ion in the electrolyte ( $\text{mol L}^{-1}$ ). At  $T = 298 \text{ K}$  (25 °C),  $\epsilon_r$  for DEC is 2.82, while EC alone has a melting point higher than  $T = 298 \text{ K}$ . Therefore,  $\epsilon_r = 90.36$  at  $T = 313 \text{ K}$  for EC is used as an approximation.<sup>4</sup> The dielectric constant for the mixed EC/DEC solvents is considered roughly linear<sup>5</sup>, thus  $\epsilon_r = 46.59$  can be estimated for the EC/DEC solvents (volume ratio 1:1). Considering the chemical formula of UN-SLi ( $\text{Zr}_6\text{O}_{38.3}\text{C}_{54.3}\text{H}_{44.5}\text{N}_6\text{S}_{2.1}\text{Li}_{2.1}$ ) and the available liquid electrolyte in UN-SLi-EM (12 mg of UN-SLi in 160  $\mu$ L of electrolyte), a molar

concentration of the negatively charged sulfonate residues can be calculated as  $7.8 \times 10^{-2} \text{ mol L}^{-1}$ .

Taking all the derived numbers into formula (1), a Debye length of  $\lambda_D = 8.4 \text{ \AA}$  can be approximated.

**Electrochemical studies.** All electrochemical characterizations were carried out by adding an equivalent amount of liquid electrolyte (160  $\mu\text{L}$  of 1M  $\text{LiPF}_6$  in EC/DEC with 5 wt% FEC) to the membranes studied (UN-SLi-EM, REF). CV tests (Biologic VMP3) were conducted in coin-cell configuration with a scan rate of  $1.0 \text{ mV s}^{-1}$  between  $-0.2$  and  $5.0 \text{ V}$ , where lithium chips were utilized as reference/counter electrodes and stainless-steel plates were used as the working electrodes.

The ionic conductivity ( $\sigma$ ,  $\text{S cm}^{-1}$ ) was measured by sandwiching electrolyte-saturated membranes by two blocking electrodes (stainless steel plates) and calculated based on the following equation:  $\sigma = 4L/\pi R D^2$ , where  $\sigma$  is conductivity,  $L$  (cm) and  $D$  (cm) are thickness and diameter of the membranes, respectively, and  $R$  (Ohm) is the resistance obtained from EIS (Solartron 1860/1287) by AC amplitude of 10 mV from  $10^6$  to 1 Hz. The ionic conductivity of UN-SLi was measured in a similar manner using a densified pellet (25 kpsi) made by sulfonated MOF powders and organic solvents (33 wt%).<sup>6</sup>

Determination of  $t_{\text{Li}^+}$  was performed through the combined measurement of alternating-current (AC) impedance and potentiostatic polarization. The time dependence of the current was detected via Li|Li symmetric cell with a voltage of 20 mV ( $\Delta V$ ) applied, during which the initial current ( $I_0$ ) was monitored until reaching the steady-state current ( $I_{ss}$ ). The same cell was monitored to measure the resistance of the electrolyte and the electrolyte–Li metal interface by EIS before ( $R_0$ ) and after ( $R_{ss}$ ) ( $10^6$  to 1 Hz, 10 mV amplitude) applying the voltage.  $t_{\text{Li}^+}$  can be calculated with the following expression:  $t_{\text{Li}^+} = I_{ss}(\Delta V - I_0 R_0) / I_0(\Delta V - I_{ss} R_{ss})$ .<sup>7</sup>

Li stripping and plating tests were performed using Li|Li cells by galvanostatically charging and discharging (Landt instrument) for a period of 2 h each at a current density of 1.0 mA cm<sup>-2</sup>, except for initial 10 cycles at 0.2 mA cm<sup>-2</sup>. The post-mortem evaluations on Li electrodes and UN-SLi-EM membranes were carried out by disassembling Li|Li cell after 50 cycles (200 h). Cu|Li asymmetric cells were assembled by a lithium chip and copper foil (15 μm in thickness) in a coin cell. Each cycle includes plating lithium on the copper with a current density of 1.0 mA cm<sup>-2</sup> for 2 h and stripping to voltage cutoff at 1.0 V (vs. Li/Li<sup>+</sup>).

Prototype batteries were fabricated by assembling a conventional LiFePO<sub>4</sub> cathode (2/13 mg cm<sup>-2</sup>) and a Li anode (760/50 μm) in coin cells (2.5 to 4 V vs. Li/Li<sup>+</sup> for LiFePO<sub>4</sub>). The LiFePO<sub>4</sub> cathodes were prepared by homogenously blending LiFePO<sub>4</sub> (MTI), acetylene black, and polyvinylidene difluoride (PVdF) at a ratio of 8:1:1 in N-Methyl-2-pyrrolidone (NMP). The resulting slurry was uniformly coated on a conductive carbon-coated Al foil and dried in a vacuum oven at 90 °C for 12 h. The specific capacity is calculated based on the active materials in the cathode. 1C charging and discharging rate here is defined as 150 mA g<sup>-1</sup>. All the electrochemical tests were carried out at ambient temperature (≈ 25 °C) unless specified.

**Materials characterizations and structural analysis.** Crystalline structures of MOFs samples were determined by the Rigaku powder X-ray diffractometer (XRD) using Kα radiation (λ = 1.54 Å). Surface morphology and particle sizes were investigated by scanning electron microscopy (Nova 230 Nano SEM) and transmission electron microscopy (FEI T12 Quick CryoEM and CryoET TEM). N<sub>2</sub> sorption/desorption measurements were conducted using a Micromeritics ASAP 2020 system at 77 K. Prior to the measurement, all samples were degassed at 120 °C for 12 h. All <sup>1</sup>H NMR samples were prepared by completely digesting MOFs samples (6 mg) in 30 μL 48% HF solution and 570 μL DMSO-d<sub>6</sub>. After sonication, MOF particles were completely

dissolved, and further analyzed by AV400 NMR (auto-sampler). AV400 was used with 5 mm broadband with Z gradient. Inductively coupled plasma atomic emission spectroscopy (ICP-AES) was performed using Shimadzu ICP-9000 instrument. The UN-SLi was digested by excessive concentrated  $\text{HNO}_3$  and  $\text{HCl}$  (vol. 1:3), dried to remove the liquid, dissolved in 5%  $\text{HCl}$  solution and formed diluted solution for the ICP-AES test. The standard curves were obtained by measuring  $\text{Li}^+$  and  $\text{Zr}^{4+}$  standard solutions with the concentrations of 0, 5, 10, 25, 50 ppm. X-ray photoelectron spectroscopy (XPS) measurements were performed on an AXIS Ultra DLD instrument. The samples were prepared in glovebox before quickly transferred to a high-vacuum chamber. The obtained raw XPS spectra were calibrated by C 1s peak at 284.8 eV and then fitted based on Gaussian–Lorentzian functions and Shirley-type background. Raman spectroscopy was conducted on a Renishaw 2000 System with a He/Ne laser at a wavelength of 633 nm. Zeta potential was measured on Zetasizer Nano instrument (Malvern) with isopropanol as the solvent. A home-made permeation cell was made by sandwiching UN-SLi-EM or REF between two cells. The left one contains anionic dye G250 (Coomassie brilliant blue) in methanol ( $5 \text{ mg L}^{-1}$ ) and the right left contains pure methanol with same volume. The pictures were taken in chronological order to allow dye molecules diffuse from left to right cells.

**COMSOL Multiphysics Simulation.** The model includes following processes: (1) charge transport: electronic charge transport in electrodes, and ionic charge transport in electrolyte; (2) species transport: in electrolyte, and within particles of electrodes; (3) Butler-Volmer electrochemical kinetics for electrodes.<sup>10</sup> As for domains, the model uses: (1) liquid electrolyte (1M  $\text{LiPF}_6$  salt in carbonate solvents) in porous separator; (2) positive porous electrode ( $\text{LiFePO}_4$  particles as active material), partial physical properties are obtained from manufacturer datasheet; (3) at negative electrode, lithium foil is used as planar electrode. As for boundary conditions, (1)

on the current collector/active material boundaries, for electronic current balance, electric potential is set 0 V at the negative electrode, and current density is given by applied discharge rate at the positive electrode; (2) current collector/active material boundaries are insulating for ionic charge balance; (3) at particle surfaces in electrodes, the species flux is determined by Butler-Volmer equation (reaction rates of electrochemical reactions).<sup>11</sup>

## Supporting Figures

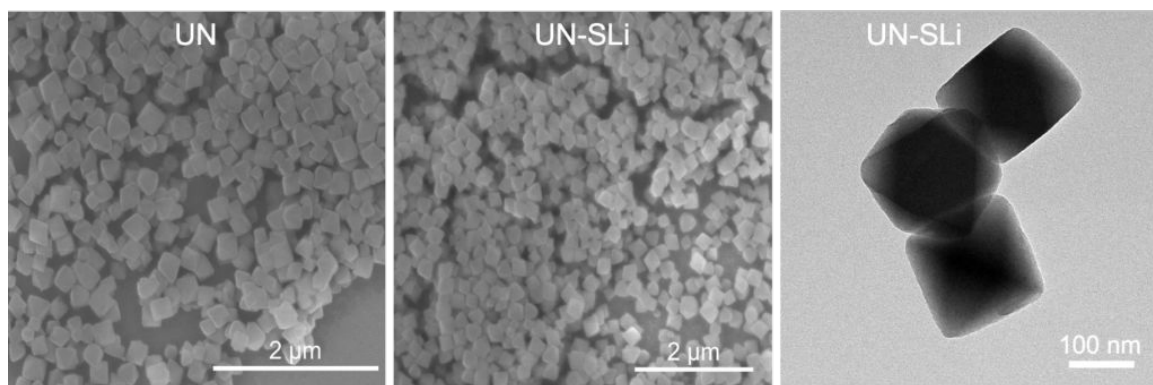

**Figure S1.** SEM images of (a) as-synthesized UN and (b) UN-SLi. (c) TEM image of UN-SLi.

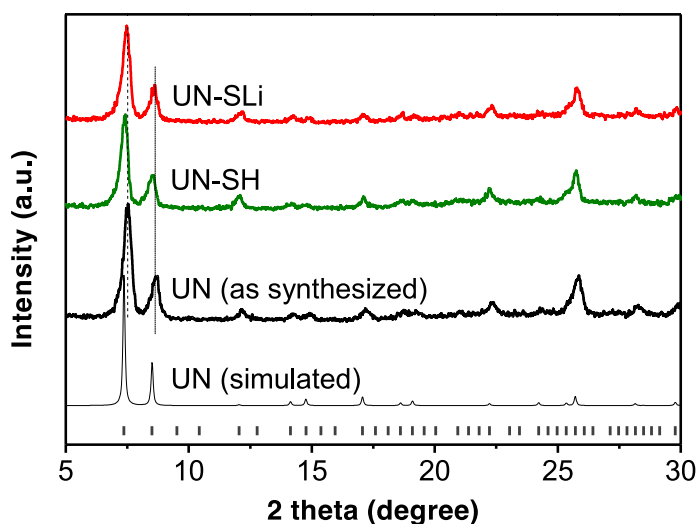

**Figure S2.** XRD patterns of UN, UN-SH and UN-SLi. A simulated UN pattern is also plotted at the bottom.

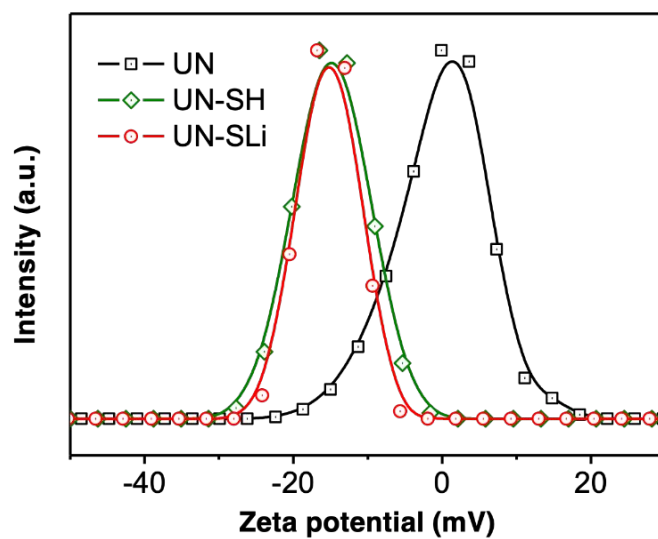

**Figure S3.** Zeta potential measurements of UN, UN-SH and UN-SLi in organic medium (isopropanol).

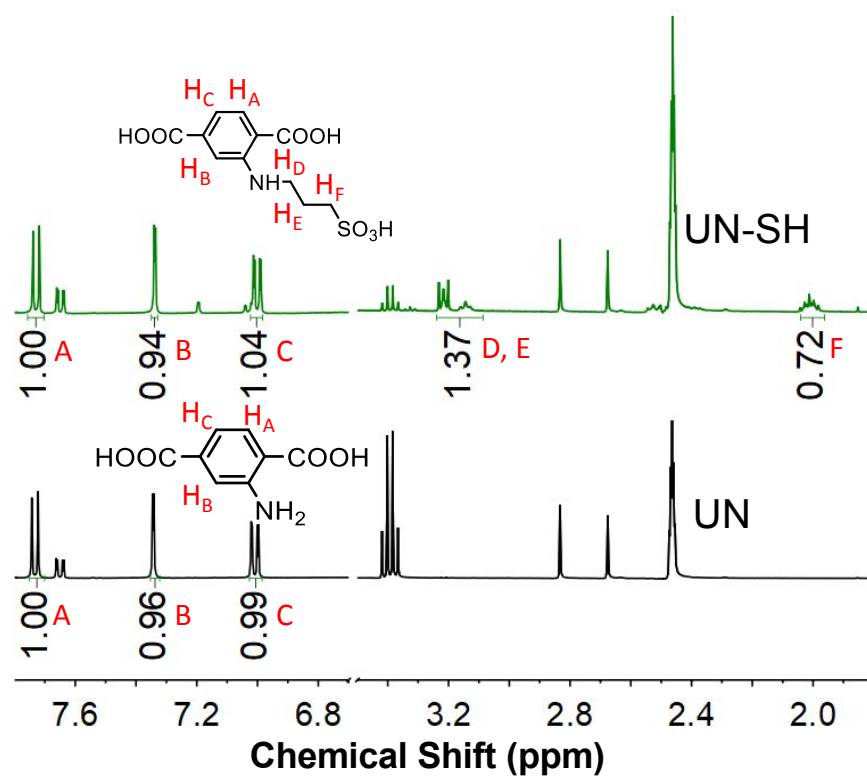

**Figure S4.**  $^1\text{H}$  NMR spectra of UN and UN-SH (3.8-6.6 ppm is omitted).

**Table S1.** ICP-AES measurement for UN-SLi.

| Element | weight concentration (mg L <sup>-1</sup> ) | molar concentration (mmol L <sup>-1</sup> ) | molar ratio (Li/Zr) |
|---------|--------------------------------------------|---------------------------------------------|---------------------|
| Zr      | 19.2                                       | 0.21                                        | 35.5%               |
| Li      | 0.517                                      | 0.0745                                      |                     |

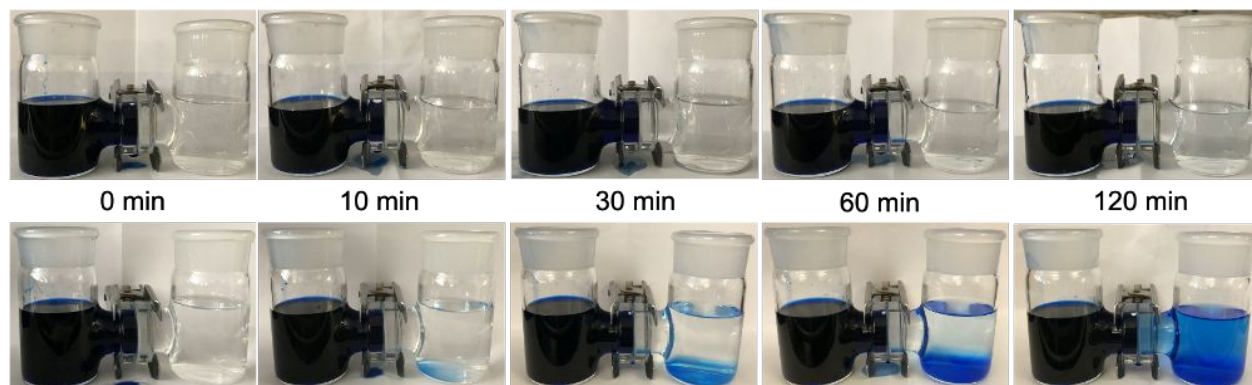

**Figure S5.** Anionic dye (G250) permeation experiments using UN-SLi-EM (upper) and REF (bottom).

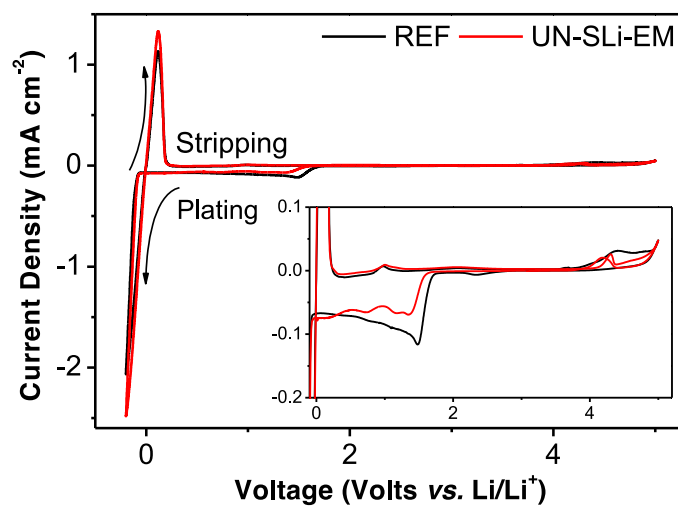

**Figure S6.** CV curves of liquid electrolytes in REF and UN-SLi-EM using stainless steel as working electrode and Li as counter/reference electrodes (inset shows the enlarged view).



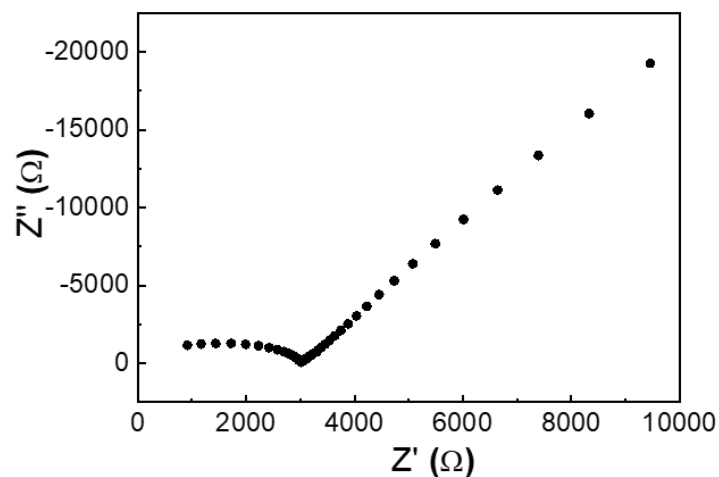

**Figure S7.** Nyquist plots of UN-SLi pellet wetted by solvents ( $\sim 20\text{ }^{\circ}\text{C}$ ). Note: the ionic resistance was derived from the intercept of semicircle and straight line.

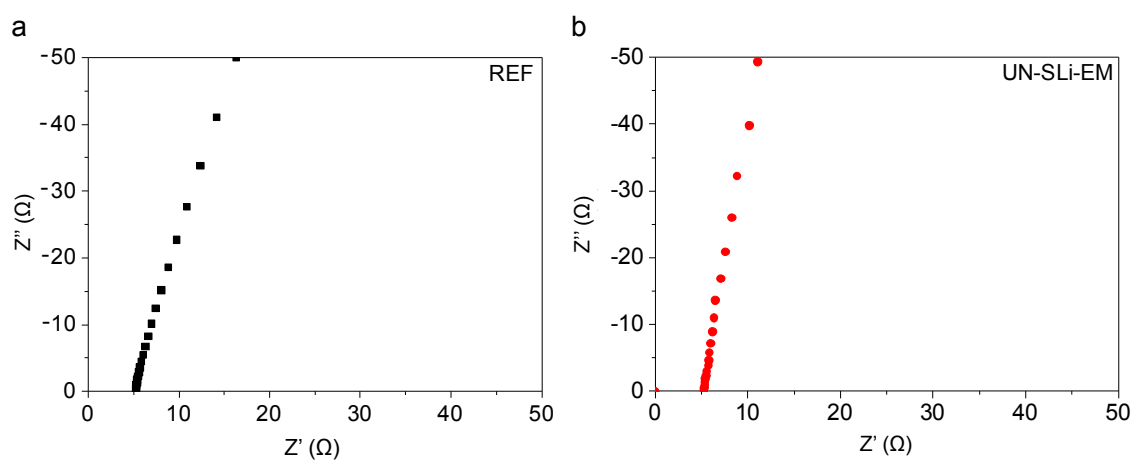

**Figure S8.** Nyquist plots ( $\sim 20\text{ }^{\circ}\text{C}$ ) of (a) REF and (b) UN-SLi-EM with equivalent amount of liquid electrolyte ( $160\text{ }\mu\text{L}$  of  $1\text{M LiPF}_6$  in EC/DEC). Note: the ionic resistance was derived from the intercept of the plots with real axis.

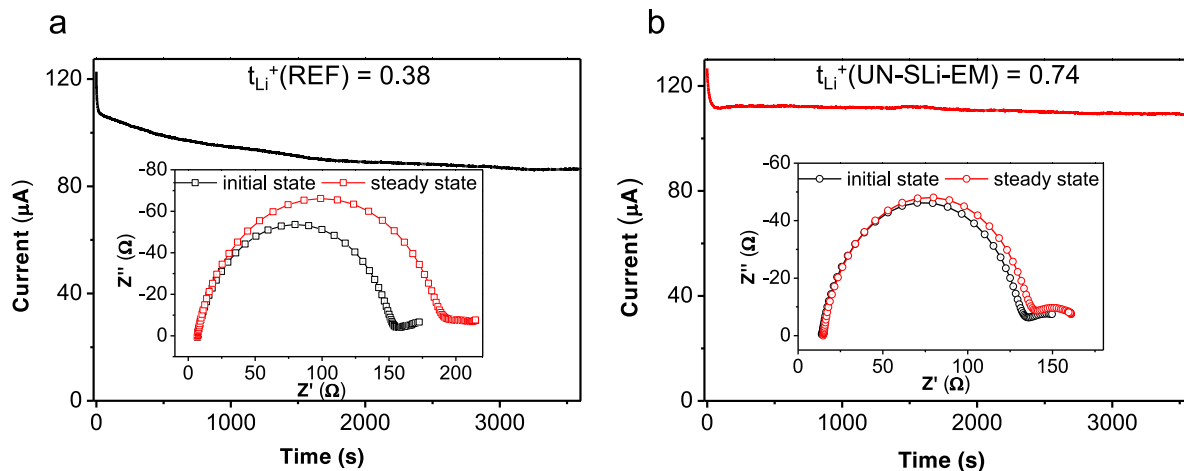

**Figure S9.**  $t_{\text{Li}^+}$  measurements of liquid electrolytes in (a) REF and (b) UN-SLi-EM using potentiostatic polarization (insets: Nyquist plots before and after polarization).

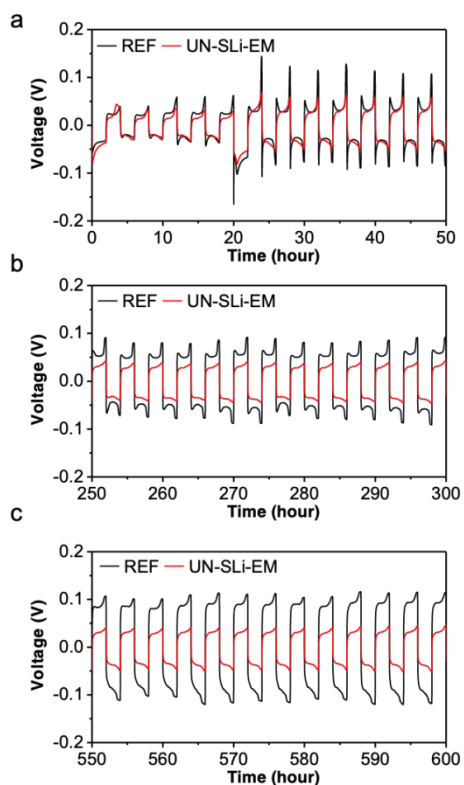

**Figure S10.** Enlarged time-dependent voltage profiles from the Li|Li cells at segments of (a) 0-50 h, (b) 250-300 h, and (c) 550-600 h. Areal capacity of 0.5 mAh  $\text{cm}^{-2}$  at 0.25 mA  $\text{cm}^{-2}$  for the initial 20 h and 2.0 mAh  $\text{cm}^{-2}$  at 1.0 mA  $\text{cm}^{-2}$  for cycles afterwards.

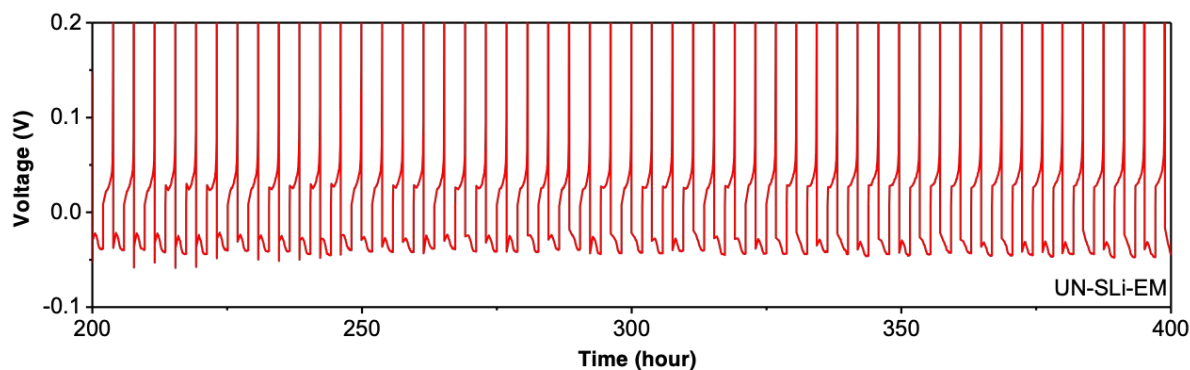

**Figure S11.** Time-dependent voltage profile (between 50<sup>th</sup> to 100<sup>th</sup> cycle) of Cu|Li cell using UN-SLi-EM.

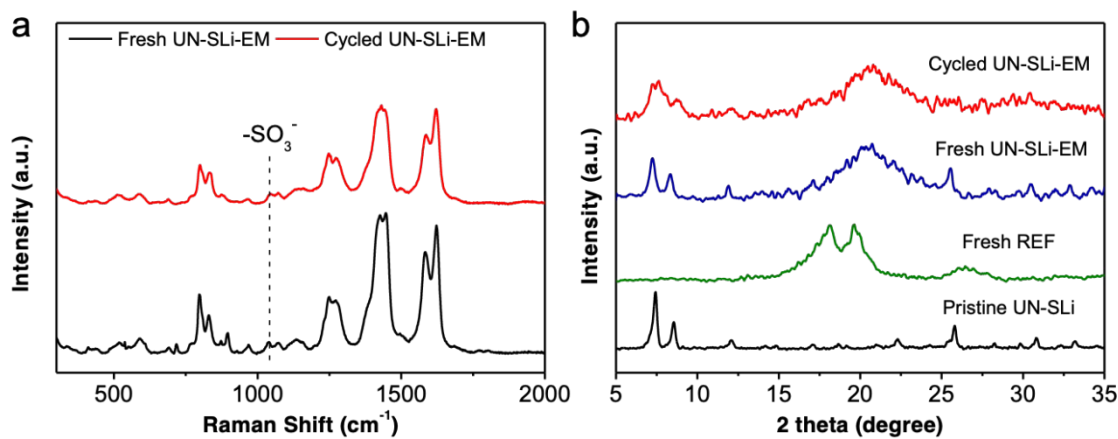

**Figure S12.** Post-cycle evaluations on UN-SLi-EM harvested from Li|Li cycling. (a) Raman spectrum of UN-SLi-EM comparing the fresh UN-SLi-EM. (b) XRD pattern of fresh and cycled UN-SLi-EM compared to UN-SLi powder and fresh REF.

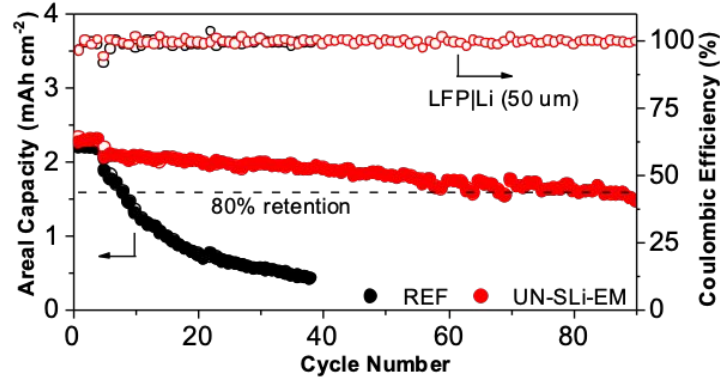

**Figure S13.** Galvanostatic cycling of LFP|Li (50μm) cells at 0.3 C (1 C = 150 mA g<sup>-1</sup>).

**Table S2.** List of parameters (adapted from COMSOL manual “1D Isothermal Lithium-Ion Battery”)<sup>12,13</sup>

| Parameter       | Value [Unit]                | Meaning                                                                       |
|-----------------|-----------------------------|-------------------------------------------------------------------------------|
| i_1C            | 3 [A m <sup>-2</sup> ]      | 1C discharge current                                                          |
| C               | 1                           | Discharge rate                                                                |
| t_plus          | 0.38                        | Li-ion transference number (in non-separator region)                          |
| sigma_f         | 1                           | Scaling factor for electrolyte ionic conductivity (in non-separator region)   |
| t_plus_SEP      | 0.38                        | Li-ion transference number (in separator region)                              |
| sigma_f_SEP     | 0.36                        | Scaling factor for electrolyte ionic conductivity (in separator region)       |
| cl_0            | 1000[mol m <sup>-3</sup> ]  | Initial electrolyte salt concentration                                        |
| c_ref           | 1000[mol m <sup>-3</sup> ]  | Reference electrolyte salt concentration for ionic conductivity interpolation |
| L_sep           | 140e-6[m]                   | Length of separator                                                           |
| L_pos           | 10e-6[m]                    | Length of positive electrode                                                  |
| T               | 298[K]                      | Temperature                                                                   |
| rp_pos          | 2e-6[m]                     | Particle radius positive electrode                                            |
| epsl_pos        | 0.63                        | Electrolyte phase volume fraction, positive electrode                         |
| epss_filler_pos | 0.073                       | Conductive filler phase volume fraction, positive electrode                   |
| epss_pos        | 1-epsl_pos-epss_filler_pos  | Electrode phase volume fraction, positive electrode                           |
| epss_neg        | 1-epsl_neg-epss_filler_neg  | Solid phase vol-fraction negative electrode                                   |
| csmx_neg        | 26390[mol m <sup>-3</sup> ] | Max solid phase concentration negative electrode                              |
| cs0_neg         | 26000[mol m <sup>-3</sup> ] | Initial concentration negative active electrode material                      |
| cs0_pos         | 3900[mol m <sup>-3</sup> ]  | Initial concentration positive active electrode material                      |
| Ks_neg          | 100[S m <sup>-1</sup> ]     | Solid phase conductivity negative electrode                                   |
| k_pos           | 4.8e-10[m s <sup>-1</sup> ] | Reaction rate coefficient positive electrode                                  |
| brugg           | 3.3                         | Bruggeman coefficient                                                         |

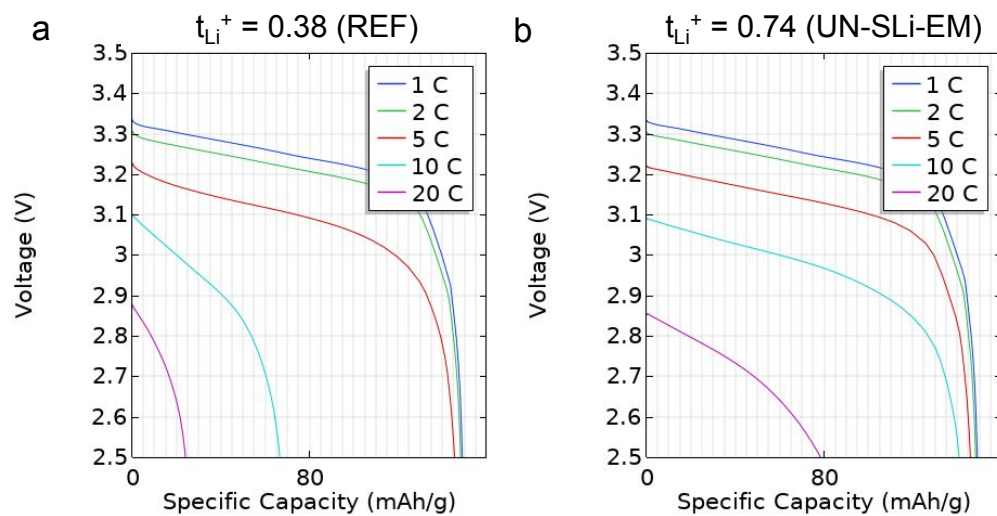

**Figure S14.** Output voltage profiles from simulated conceptual cell (LFP|Li) as a function of C-rate.

## Supporting References:

- (1) Katz, M. J.; Brown, Z. J.; Colón, Y. J.; Siu, P. W.; Scheidt, K. A.; Snurr, R. Q.; Hupp, J. T.; Farha, O. K. A Facile Synthesis of UiO-66, UiO-67 and Their Derivatives. *Chem. Commun.* **2013**, 49, 9449–9451.
- (2) Russel, W. B.; Saville, D. A.; Schowalter, W. R. *Colloidal Dispersions*; Cambridge University Press: Cambridge, 1989.
- (3) Kohonen, M. M.; Karaman, M. E.; Pashley, R. M. Debye Length in Multivalent Electrolyte Solutions. *Langmuir* **2000**, 16, 5749–5753.
- (4) Wrodnigg, G. H.; Besenhard, J. O.; Winter, M. Cyclic and Acyclic Sulfites: New Solvents and Electrolyte Additives for Lithium Ion Batteries with Graphitic Anodes? *J. Power Sources* **2001**, 97–98, 592–594.
- (5) Jouyban, A.; Soltanpour, S.; Chan, H.-K. A Simple Relationship between Dielectric Constant of Mixed Solvents with Solvent Composition and Temperature. *Int. J. Pharm.* **2004**, 269, 353–360.
- (6) Peterson, G. W.; DeCoste, J. B.; Fatollahi-Fard, F.; Britt, D. K. Engineering UiO-66-NH<sub>2</sub> for Toxic Gas Removal. *Ind Eng Chem Res* **2014**, 53, 701–707.
- (7) Zugmann, S.; Fleischmann, M.; Amereller, M.; Gschwind, R. M.; Wiemhöfer, H. D.; Gores, H. J. Measurement of Transference Numbers for Lithium Ion Electrolytes via Four Different Methods, a Comparative Study. *Electrochim. Acta* **2011**, 56, 3926–3933.
- (8) Cai, G.; Jiang, H.-L. A Modulator-Induced Defect-Formation Strategy to Hierarchically Porous Metal-Organic Frameworks with High Stability. *Angew. Chem. Int. Ed. Engl.* **2017**, 56, 563–567.
- (9) Cai, G.; Ding, M.; Wu, Q.; Jiang, H.-L. Encapsulating Soluble Active Species into Hollow Crystalline Porous Capsules beyond Integration of Homogeneous and Heterogeneous Catalysis. *Natl Sci Rev* **2020**, 7, 37–45.
- (10) Lagadec, M. F.; Zahn, R.; Wood, V. Characterization and Performance Evaluation of Lithium-Ion Battery Separators. *Nat. Energy* **2018**.
- (11) Lee, B.-S.; Yang, H.-S.; Jung, H.; Jeon, S.-Y.; Jung, C.; Kim, S.-W.; Bae, J.; Choong, C.-L.; Im, J.; Chung, U.-I.; *et al.* Novel Multi-Layered 1-D Nanostructure Exhibiting the Theoretical Capacity of Silicon for a Super-Enhanced Lithium-Ion Battery. *Nanoscale* **2014**, 6, 5989–5998.
- (12) Moura, S. J.; Argomedeo, F. B.; Klein, R.; Mirtabatabaei, A.; Krstic, M. Battery State Estimation for a Single Particle Model with Electrolyte Dynamics. *IEEE Trans. Contr. Syst. Technol.* **2017**, 25, 453–468.
- (13) Cai, L.; White, R. E. Mathematical Modeling of a Lithium Ion Battery with Thermal Effects in COMSOL Inc. Multiphysics (MP) Software. *J. Power Sources* **2011**, 196, 5985–5989.
